# Supplementary material
Source: PubMed Central journal article supplement (PMC2712237)
Supplement: mmc1.pdf [file mmc1.pdf]

Biophysical Journal, Volume 96

**Supporting Material**

**Growth pattern of single fission yeast cells is bilinear and depends on temperature and DNA synthesis**

Stephan Baumgärtner and Iva M. Tolić-Nørrelykke

## **MOVIE CAPTIONS**

**Movie 1.** Growth and division of two typical fission yeast cells with GFP-labeled membranes at 25°C. The time interval between the frames is 2 min; the images are maximum intensity projections; the movie is displayed at 12 frames per second (fps).

**Movie 2.** Growth of cells at 28°C imaged with a 2 min time interval, shown with a frame rate of 12 fps.

**Movie 3.** Growth of cells at 32°C imaged with a 2 min time interval, shown with a frame rate of 12 fps.

**Movie 4.** This movie shows cells imaged with a time interval of 30 seconds. Corresponds to Figure 2a. The frame rate is 12 fps.

**Movie 5.** Growth of cells treated with hydroxyurea (HU). Images were taken every 2 min and the movie is displayed at 12 fps.
